# Supplementary material for: Discovery of in vivo Virulence Genes of Obligatory Intracellular Bacteria by Random Mutagenesis
Source: PubMed Central journal article supplement (PMC7010607; doi:10.3389/fcimb.2020.00002), 2020-02-04
Supplement: Table_1.pdf [file Table_1.pdf]

**SUPPLEMENTARY TABLES**

**Table S1. Primers used in this study \***

| <b>ST-PCR Primers</b>    |                                                    |                               |
|--------------------------|----------------------------------------------------|-------------------------------|
| <b>Primer</b>            | <b>Primer sequence</b>                             | <b>Target site</b>            |
| P1 <sup>1</sup>          | CTCCATCTTTTCAGCTTCAGGCG                            | mCherry                       |
| P2 <sup>1</sup>          | GGCCACGCGTCGACTAGTACNNNNNNNNNGATAT                 | Degenerate primer             |
| P5                       | AGTCACCATTGTTGTGCACGACGAC                          | <i>aad</i>                    |
| P4 <sup>1</sup>          | GGCCACGCGTCGACTAGTAC                               | Defined primer for P2 nesting |
| P6                       | AACCGGCAAATCGCGCCGAA                               | <i>aad</i> nesting            |
| P3 <sup>1</sup>          | GTCTGTGTGCCTTCATACGGTC                             | mCherry nesting               |
| <b>Screening primers</b> |                                                    |                               |
| Himar1                   | F: ATCAAGCCTTACGGTCACCG<br>R: ATGGGAACGCGTCATGAACT | <i>aad</i> and mCherry span   |

| <b>Gene Specific Primers</b>                                | <b>Locus ID</b> | <b>Product size (bp)</b> |
|-------------------------------------------------------------|-----------------|--------------------------|
| F: TGGTCTAATTATAGTGATGCTATGG<br>R: AGTTTCTTTCTAAAACCATTACG  | EHF_0231        | 114                      |
| F: ATGGCATCGGGTTGTTGTTTC<br>R: GACTTTACACAATACGCTTGACTT     | EHF_0522        | 468                      |
| F: TCCTCCCAGAATTTTCGCACA<br>R: GAATGTTGCTTTAATTCACCAGC      | EHF_RS04100     | 373                      |
| F: CACAAAGAAAGCATATAGTGGAGGT<br>R: ACGCATGTATCGTAAATGCATACT | Up EHF_0151     | 98                       |
| F: TCAATATAGAACAACATACTACAAA<br>R: TCTGCTTCATCAGATTCTACT    | EHF_0962        | 421                      |
| F: GCACTGATATTATTTGCAGGTACAG<br>R: GCTTTCCTTGTGTTTTGGCTTCAA | EHF_0880        | 229                      |
| F: TCTACTGATTTGTAAACAATGGAT<br>R: TGCAAGTAGTGCTCCTGTTA      | EHF_0933        | 338                      |
| F: ACTGCTATAGCTCTTACATTAGTCT<br>R: GGCATAACCATTTACGAAACACA  | EHF_0332        | 150                      |
| F: GGATGAACTGGTAGGCAACTGATA<br>R: AATAGAGCAATCAACCCAACGGCT  | EHF_0150        | 466                      |
| <b>Insertion Specific Primers</b>                           |                 |                          |
| F: P3<br>R: TTCCTGACCATTTTGTCTTGCCCA                        | EHF_0382        | 549                      |

\* Unless cited with a reference, all other primers were designed in this study.

|                                       |             |     |
|---------------------------------------|-------------|-----|
| F: P6<br>R: ACCGGAACTTCCTGCTGCAACG    | EHF_0135    | 427 |
| F: TCCTCCCAGAATTTTCGCACA<br>R: P3     | EHF_RS04100 | 588 |
| F: P6<br>R: TAGTTTTGTAAGCTGTGCCCCT    | EHF_0733    | 329 |
| F: TCAGAGCAACAACAGCTGCAATCC<br>R: P3  | EHF_0758    | 746 |
| F: ACGCATGTATCGTAAATGCATACT<br>R: P3  | EHF_0151    | 416 |
| F: P6<br>R: GACTTTACACAATACGCTTGACTT  | EHF_0522    | 970 |
| F: P6<br>R: ACCTGGAGTGTCAATTCTCTGATCC | EHF_0048    | 347 |

| qPCR primers                              |                                                            | Purpose                                        |
|-------------------------------------------|------------------------------------------------------------|------------------------------------------------|
| Mouse<br>GAPDH <sup>2</sup>               | F: GTTGTCTCCTGCGACTTCA<br>R: GGTGGTCCAGGGTTTCTTA           | GAPDH for normalizing<br>infected mouse tissue |
| <i>Ehrlichia</i> 16S<br>rRNA <sup>3</sup> | F: CGGGGGAAAGATTTATCGCTATTA<br>R: CGCTTGCCCCCTCCGTATTA     | Quantifying <i>Ehrlichia</i>                   |
| qRT-PCR primers <sup>4</sup>              |                                                            |                                                |
| TNF- $\alpha$                             | F: CATCTTCTCAAATTCGAGTGACAA<br>R: TGGGAGTAGACAAGGTACAACCC  | TNF- $\alpha$ expression                       |
| IL-1 $\beta$                              | F: GGGCCTCAAAGGAAAGAATC<br>R: TACCAGTTGGGGAAGTCTGC         | IL-1 $\beta$ expression                        |
| IFN- $\gamma$                             | F: GCGTCATTGAATCACACCTG<br>R: TGAGCTCATTGAATGCTTGG         | IFN- $\gamma$ expression                       |
| IL-6                                      | F: GAGGATACCACTCCCAACAGACC<br>R: AAGTGCATCATCGTTGTTTCATACA | IL-6 expression                                |
| IL-12 <i>p40</i>                          | F: AAGGAACAGTGGGTGTCCAG<br>R: CATCTTCTTCAGGCGTGTCA         | IL-12 $\beta$ expression                       |
| IL-10                                     | F: GGTTGCCAAGCCTTATCGGA<br>R: ACCTGCTCCACTGCCTTGCT         | IL-10 expression                               |

#### References:

- 1) Indukuri, V. (2013). Transposon based mutagenesis and mapping of transposon insertion sites within the *Ehrlichia chaffeensis* genome using semi random two-step PCR. Master of Science Thesis, Kansas State University.
- 2) Prima, V., Kaliberova, L.N., Kaliberov, S., Curiel, D.T., and Kusmartsev, S. (2017). COX2/mPGES1/PGE(2) pathway regulates PD-L1 expression in tumor-associated macrophages and myeloid-derived suppressor cells. *Proceedings of the National Academy of Sciences of the United States of America* 114, 1117-1122.
- 3) Niu, H., Rikihisa, Y., Yamaguchi, M., and Ohashi, N. (2006). Differential expression of VirB9 and VirB6 during the life cycle of *Anaplasma phagocytophilum* in human leucocytes is associated with differential binding and avoidance of lysosome pathway. *Cell Microbiol* 8, 523-534.

- 4) Miura, K., and Rikihisa, Y. (2009). Liver transcriptome profiles associated with strain-specific *Ehrlichia chaffeensis*-induced hepatitis in SCID mice. *Infect Immun* 77, 245-254.
