# Supplementary material for: Discovery of in vivo Virulence Genes of Obligatory Intracellular Bacteria by Random Mutagenesis
Source: PubMed Central journal article supplement (PMC7010607; doi:10.3389/fcimb.2020.00002), 2020-02-04
Supplement: Table_2.pdf [file Table_2.pdf]

## SUPPLEMENTARY TABLES

**Table S2. Himar insertion sites in *Ehrlichia* sp. HF genome**

| Isolate ID | Genomic Insertion Loci | Locus ID                                                 | Gene Product                                                 | Homologies in Rickettsiales                                                                         |
|------------|------------------------|----------------------------------------------------------|--------------------------------------------------------------|-----------------------------------------------------------------------------------------------------|
| H5         | 98810                  | Intergenic                                               | n/a                                                          | n/a                                                                                                 |
| H19        | 245409                 | EHF_0231                                                 | Hypothetical protein                                         | 32% Eucl, 28% Emu                                                                                   |
| H34        | 580467                 | EHF_0522                                                 | RmuC family protein                                          | 96% Emu, 94% Eucl, 94% Emu, 89% Ech, 85% Eca, 85% Emin, 60% Ana                                     |
| H35        | 364974                 | Intergenic                                               | n/a                                                          | n/a                                                                                                 |
| H43A       | 835933                 | EHF_0733                                                 | Hypothetical protein with GTA TIM-barrel-like domain protein | 94% Emu, 94% Eucl, 83% Ech, 79% Eca, 77% Emin, 63% Eru, 40% Wol, 38% Ana                            |
| H43B       | 1050791                | EHF_RS04100                                              | Conserved hypothetical protein with SSL domain               | 62% Emu, 44% Ech, 37% Emin, 34% Eca, 25% Eru                                                        |
| H43F       | 133819                 | EHF_0135                                                 | trbC/VIRB2 family protein                                    | 90% Emu, 84% Eucl, 78% Ech, 74% Emin, 71% Eru, 74% Ana                                              |
| H47        | 839819                 | Intergenic, 9 bp upstream of EHF_0735                    | Major facilitator superfamily protein                        | 90% Emu, 90% Eucl, 83% Ech, 78% Eca, 76% Emin, 67% Eru, 36% Wol                                     |
| H53C       | 252371                 | Intergenic, 343 up EHF_0242                              | Conserved hypothetical protein                               | n/a                                                                                                 |
| H53D-1     | 371562                 | Intergenic                                               | n/a                                                          | n/a                                                                                                 |
| H53D-2     | 794748                 | EHF_0703                                                 | thiamine biosynthesis protein ThiC                           | 95% Emu, 95% Eucl, 92%, Ech, 88% Eca, 88% Emin, 88% Eru, 75% Nlo, 73% Aov, 72% Ama, 69% Aph         |
| H53E       | 150136                 | EHF_0140                                                 | Conserved hypothetical protein                               | 72% Emu, 50% Ech, 46% Emin, 48% Eca, 41% Eru, 25% Ana                                               |
| H53F       | 884488                 | Intergenic                                               | n/a                                                          | n/a                                                                                                 |
| H54        | 241428                 | Intergenic                                               | n/a                                                          | n/a                                                                                                 |
| H55        | 406316                 | EHF_0382                                                 | comEC/Rec2-related domain protein                            | 93% Emu, 93% Eucl, 80% Ech, 74% Eca, 73% Emin, 63% Eru, 47% Nlo, 45% Wol, 42% Aov, 39% Ama, 40% Aph |
| H55E       | 973392                 | Intergenic, 376 bp up EHF_0841                           | COQ9 family protein                                          | n/a                                                                                                 |
| H56A       | 1143100                | Intergenic, 157 bp up EHF_0993 and 126 bp up EHF_RS04480 | 120 kDa immunodominant surface protein, Ferredoxin           | n/a                                                                                                 |
| H56B       | 353657                 | EHF_0324                                                 | lipoate-protein ligase B (LipB)                              | 95% Eucl, 95% Emu, 86% Ech, 80% Eca, 80% Emin,                                                      |

|        |         |                                                       |                                                                                        |                                                                           |
|--------|---------|-------------------------------------------------------|----------------------------------------------------------------------------------------|---------------------------------------------------------------------------|
|        |         |                                                       |                                                                                        | 76% Eru, 60% Aph, 57% Wol, 59% Nlo                                        |
| H56D   | 424981  | Intergenic, 130 bp up EHF_0399 and 439 bp up EHF_0402 | Polyprenyl synthetase protein, Ribonucleoside-diphosphate reductase subunit            | n/a                                                                       |
| H57A   | 695771  | EHF_0623                                              | Conserved hypothetical protein                                                         | 47% Eucl, 46% Emu, 31% Ech, 24% Emin                                      |
| H57B   | 1122448 | Intergenic                                            | n/a                                                                                    | n/a                                                                       |
| H58A   | 908826  | Intergenic                                            | n/a                                                                                    | n/a                                                                       |
| H58C   | 871479  | EHF_0758                                              | Hypothetical protein                                                                   | 43% Eucl, 44% Emu, 30% Eca, 30% Emin, 30% Ech                             |
| H58D   | 163171  | Intergenic, 184 bp up EHF_0151                        | type I secretion outer membrane/TolC family protein                                    | n/a                                                                       |
| H59    | 1106870 | EHF_0962                                              | Conserved hypothetical protein                                                         | 80% Emu, 80% Ech, 71% Eca, 62% Emin, 48% Eru                              |
| H60D   | 144692  | Intergenic, 506 bp up EHF_0139                        | Conserved hypothetical protein                                                         | n/a                                                                       |
| H60E   | 1142873 | EHF_0993                                              | 120 kDa immunodominant surface protein                                                 | 44% Emu, 38% Eucl, 41% Eca, 30% Ech                                       |
| H62    | 1048515 | Intergenic                                            | n/a                                                                                    | n/a                                                                       |
| H64A   | 163135  | Intergenic, 148 bp up EHF_0151 and 411 bp up EHF_0152 | type I secretion outer membrane/TolC family protein, ribosomal protein L13             | n/a                                                                       |
| H64C   | 341553  | Intergenic                                            | n/a                                                                                    | n/a                                                                       |
| H64F-1 | 253435  | EHF_0242                                              | Hypothetical protein                                                                   | 78% Eucl, 78% Emu, 72% Ech, 51% Eca, 32% Eru                              |
| H64F-2 | 754040  | EHF_0671                                              | Conserved hypothetical protein                                                         | 78% Eucl, 78% Emu, 72% Ech, 50% Eca, 31% Eru                              |
| H65A   | 117218  | Intergenic                                            | n/a                                                                                    | n/a                                                                       |
| H65D   | 1018235 | EHF_0880                                              | Conserved hypothetical protein                                                         | 72% Emu, 52% Eca, 55% Emin, 53% Ech                                       |
| H66A   | 1074892 | EHF_0933                                              | Conserved hypothetical protein                                                         | 92% Emu, 82% Eca, 80% Ech, 76% Emin, 77% Eru, 48% Anas, 54% Nlo, 44% Rick |
| H66C   | 357439  | Intergenic, 289 bp up EHF_0326 and 78 bp up EHF_0328  | DNA / pantothenate metabolism flavoprotein family protein, class II fumarate hydratase | n/a                                                                       |
| H66F   | 364844  | EHF_0332                                              | Conserved hypothetical protein                                                         | 74% Emu, 73% Eucl, 58% Ech, 45% Eca, 44% Emin, 38% Eru                    |
| H67A   | 309891  | Intergenic, 560 bp up EHF_0288                        | Phosphoglycolate hydrolase                                                             | n/a                                                                       |
| H67C   | 61587   | EHF_0066                                              | major outer membrane protein OMP1-2                                                    | 93% Emu, 90% Eucl, 65% Ech, 56% Eca, 56% Emin, 45% Eru                    |
| H67E   | 1074820 | Intergenic, 311 bp up EHF_0932                        | ATP synthase subunit delta                                                             | n/a                                                                       |

|        |         |                                        |                                      |                                                                                                     |
|--------|---------|----------------------------------------|--------------------------------------|-----------------------------------------------------------------------------------------------------|
| H67F   | 792889  | EHF_0702                               | Smr domain-containing protein        | 87% Emu, 87% Eucl, 76% Ech, 66% Eca, 64% Emin                                                       |
| H68B   | 593034  | Intergenic, 199 bp up EHF_0532         | gram-negative porin family protein   | n/a                                                                                                 |
| H68C-1 | 671520  | Intergenic                             | n/a                                  | n/a                                                                                                 |
| H68C-2 | 269259  | Intergenic, 254 bp up EHF_0253         | Conserved hypothetical protein       | n/a                                                                                                 |
| H68E   | 1035030 | Intergenic, 468 bp up EHF_0893         | Hypothetical protein                 | n/a                                                                                                 |
| H69C   | 569620  | Intergenic, 272 bp up EHF_0515         | Conserved hypothetical protein       | n/a                                                                                                 |
| H69E   | 810865  | EHF_0717                               | major facilitator family transporter | 96% Eucl, 94% Emu, 83% Ech, 74% Eca, 72% Emin, 68% Eru                                              |
| H69F-1 | 579965  | EHF_0522                               | DNA recombination protein RmuC       | See H34                                                                                             |
| H69F-2 | 45987   | EHF_0048                               | major outer membrane protein OMP1-17 | 94% Emu, 93% Eucl, 85% Ech, 79% Emin, 70% Eca, 68% Eru, 67% Eew                                     |
| H72A-1 | 161141  | EHF_0150                               | DUF2497 domain-containing protein    | 96% Eucl, 94% Emu, 85% Ech, 79% Eca, 78% Emin, 63% Eru, 35% Nlo, 30% Ana                            |
| H72A-2 | 1083158 | 307 bp up EHF_0939                     | citrate (Si)-synthase                | n/a                                                                                                 |
| H72B   | 1059627 | EHF_0919                               | amidophosphoribosyltransferase ComF  | 93% Emu, 82% Ech, 80% Eca, 74% Eru, 54% Wol, 55% Nlo, 45% Aph, 41% Ama, 39% Aov                     |
| H72C   | 872359  | EHF_0758                               | Hypothetical protein                 | See H58C                                                                                            |
| H72D   | 63069   | Intergenic, 23 bp upstream of EHF_0067 | major outer membrane protein OMP1-1  | 89% Emu, 88% Eucl, 80% Ech, 72% Eca, 71% Emin, 66% Eew, 60% Eru, 43% Nlo                            |
| H72E   | 248268  | EHF_0237                               | DNA-3-methyladenine glycosylase      | 93% Emu, 87% Ech, 80% Eca, 78% Emin, 73% Eru, 63% Wol, 63% Nlo, 56% Ots                             |
| H73A-1 | 72763   | EHF_0075                               | dethiobiotin synthase                | 91% Eucl, 92% Emu, 79% Ech, 72% Eca, 73% Emin, 70% Eru, 50% Ace, 50% Ama, 48% Aph                   |
| H73A-2 | 186084  | Intergenic, 516 bp up EHF_0173         | transcription termination factor Rho | n/a                                                                                                 |
| H73B   | 308181  | Intergenic, 390 bp up EHF_0286         | pyruvate, phosphate dikinase         | n/a                                                                                                 |
| H73C   | 456831  | Intergenic                             | n/a                                  | n/a                                                                                                 |
| H73D-1 | 21696   | Intergenic                             | n/a                                  | n/a                                                                                                 |
| H73D-2 | 566454  | EHF_0513                               | tellurium resistance protein TerC    | 91% Emu, 90% Eucl, 83% Ech, 82% Eca, 79% Emin, 72% Eru, 52% Nlo, 52% Wol, 44% Aov, 44% Ama, 43% Ace |

|        |         |                                                      |                                                                                        |                                                                                                                                  |
|--------|---------|------------------------------------------------------|----------------------------------------------------------------------------------------|----------------------------------------------------------------------------------------------------------------------------------|
| H73E-1 | 490405  | EHF_0445                                             | trbL/VirB6 plasmid conjugal transfer family protein                                    | 77% Emu, 73% Eucl, 82% Ech, 51% Eca, 52% Emin, 70% Eru                                                                           |
| H73E-2 | 1016610 | EHF_0877                                             | transcriptional regulator NrdR                                                         | 99% Emu, 94% Ech, 89% Eca, 91% Emin, 88% Eru, 68% Nlo, 59% Ace, 58% Aov, 59% Aph                                                 |
| H73F   | 456831  | Intergenic                                           | n/a                                                                                    | n/a                                                                                                                              |
| H74A-1 | 47534   | Intergenic, 188 bp up EHF_0050                       | P44/Msp2 family outer membrane protein                                                 | n/a                                                                                                                              |
| H74A-2 | 699943  | Intergenic, 68 bp up EHF_0625 and 363 bp up EHF_0626 | bifunctional FolC family protein, aspartyl/glutamyl-tRNA amidotransferase subunitA     | n/a                                                                                                                              |
| H74B-1 | 366003  | EHF_0333                                             | dihydropteroate synthase                                                               | 94% Emu, 94% Eucl, 71% Eru, 56% Ech, 56% Eca, 56% Emin                                                                           |
| H74B-2 | 822691  | Intergenic, 34 bp up EHF_0723 and 140 bp up EHF_0724 | DNA mismatch repair protein MutS, aspartyl/glutamyl-tRNA amidotransferase subunitA     | EHF_0723: 97% Eucl, 98% Emu, 93% Ech, 88% Emin, 89% Eca, 79% Eru, 67% Nlo, 63% Wol, 59% Aph, 57% Ama, 57% Aov, 57% Ace, 51% Rick |
| H74C   | 28140   | EHF_0031                                             | Chromosome partitioning ATPase ParA                                                    | 97% Emu, 98% Eucl, 89% Eru, 95% Ech, 94% Eca, 93% Emin, 89% Nlo, 70% Aov, 70% Ama, 67% Wol, 66% Rick                             |
| H74D   | 1086516 | EHF_0943                                             | Hypothetical protein                                                                   | 63% Eucl, 59% Emu, 37% Emin, 33% Ech, 36% Eca                                                                                    |
| H74E   | 257823  | Intergenic                                           | n/a                                                                                    | n/a                                                                                                                              |
| H74F-1 | 470413  | Intergenic, 16 bp up EHF_0435                        | tRNA-Arg                                                                               | n/a                                                                                                                              |
| H74F-2 | 886486  | EHF_0768                                             | conserved hypothetical protein                                                         | 61% Emu, 46% Ech, 32% Eru                                                                                                        |
| H75A-1 | 354464  | Intergenic                                           | n/a                                                                                    | n/a                                                                                                                              |
| H75A-2 | 428707  | Intergenic                                           | n/a                                                                                    | n/a                                                                                                                              |
| H75A-3 | 188310  | Intergenic                                           | n/a                                                                                    | n/a                                                                                                                              |
| H75B-1 | 45586   | EHF_0048                                             | major outer membrane protein OMP1-17                                                   | See H69F-2                                                                                                                       |
| H75B-2 | 1028718 | Intergenic, 319 bp up EHF_0885, 222 bp up EHF_0888   | NADP-dependent malic enzyme, ABC transporter                                           | n/a                                                                                                                              |
| H75C   | 308227  | EHF_0287                                             | RDD family protein                                                                     | 92% Emu, 90% Eucl, 81% Ech, 81% Eca, 80% Emin, 67% Eru, 35% Ana, 42% Wol, 33% Rick                                               |
| H75D-1 | 838124  | Intergenic                                           | n/a                                                                                    | n/a                                                                                                                              |
| H75D-2 | 765049  | Intergenic, 19 bp up EHF_0677,                       | RNA pseudouridylate synthase family protein, extragenic suppressor protein suhB (suhB) | EHF_0677: 92% Emu, 91% Eucl, 79% Ech, 76% Eca,                                                                                   |

|            |         |                                                                |                                                                                             |                                                                                                      |
|------------|---------|----------------------------------------------------------------|---------------------------------------------------------------------------------------------|------------------------------------------------------------------------------------------------------|
|            |         | 502 bp up<br>EHF_0678                                          |                                                                                             | 74% Emin, 67% Eru, 49%<br>Wol, 47% Ana, 39% Rick                                                     |
| H75E       | 939557  | Intergenic, 99 bp<br>up EHF_0812                               | patatin-like phospholipase family<br>protein                                                | n/a                                                                                                  |
| H75F-1     | 869649  | EHF_0758                                                       | hypothetical protein                                                                        | See H58C                                                                                             |
| H75F-2     | 582106  | Intergenic                                                     | n/a                                                                                         | n/a                                                                                                  |
| H75F-3     | 364700  | EHF_0332                                                       | conserved hypothetical protein                                                              | See H66E                                                                                             |
| H75F-4     | 831375  | EHF_0732                                                       | phage conserved hypothetical<br>BR0599 family protein                                       | 93% Emu, 83% Ech, 76%<br>Emin, 77% Eca, 66% Eru,<br>49% Nlo, 40% Wol, 40% Ana                        |
| H76A-1     | 847362  | EHF_0743                                                       | glutathione S-transferase                                                                   | 97% Emu, 97% Eucl, 94%<br>Ech, 94% Emin, 95% Eca,<br>86% Eru, 68% Nlo, 63% Wol,<br>60% Ana, 48% Rick |
| H76A-2     | 273766  | Intergenic                                                     | n/a                                                                                         | n/a                                                                                                  |
| H76A-3     | 43980   | Intergenic, 122<br>bp up EHF_0045                              | P44/Msp2 family outer<br>membrane protein                                                   | n/a                                                                                                  |
| H76B-1     | 1086497 | EHF_0943                                                       | hypothetical protein                                                                        | See H74D                                                                                             |
| H76B-2     | 517679  | EHF_0470                                                       | conserved hypothetical protein                                                              | 79% Emu, 73% Ech, 66%<br>Eca, 66% Emin, 50% Eru,<br>30% Ana                                          |
| H76C       | 1092639 | Intergenic, 262<br>bp up<br>EHF_0950, 121<br>up EHF_0951       | protein translocase subunit<br>SecF, archaeal holliday junction<br>resolvase family protein | n/a                                                                                                  |
| H76D-<br>1 | 1112797 | Intergenic, 183<br>bp up EHF_0967<br>AND 844 bp up<br>EHF_0966 | 1-acyl-sn-glycerol-3-phosphate<br>acyltransferase                                           | n/a                                                                                                  |
| H76D-2     | 376020  | Intergenic, 142<br>bp up EHF_0341                              | SPFH domain / Band 7 family<br>(membrane) protein                                           | n/a                                                                                                  |
| H76E-1     | 150664  | EHF_0140                                                       | conserved hypothetical protein                                                              | See H53E                                                                                             |
| H76E-2     | 149069  | Intergenic, 268<br>bp up EHF_0140                              | conserved hypothetical protein                                                              | n/a                                                                                                  |
| H76F       | 179134  | EHF_0167                                                       | aspartate kinase                                                                            | 96% Emu, 95% Eucl, 93%<br>Ech, 93% Eca, 91% Emin,<br>81% Eru, 65% Nlo, 51% Ana                       |
| H77A-1     | 792823  | EHF_0702                                                       | smr domain protein                                                                          | See H67F                                                                                             |
| H77A-2     | 765387  | Intergenic, 360<br>bp up EHF_0677                              | pseudouridine synthase                                                                      | n/a                                                                                                  |
| H77A-3     | 41666   | Intergenic, 166<br>bp up EHF_0042                              | P44/Msp2 family outer<br>membrane protein                                                   | n/a                                                                                                  |
| H77A-4     | 43288   | Intergenic                                                     | major outer membrane protein<br>OMP1-19                                                     |                                                                                                      |
| H77A-5     | 150664  | EHF_0140                                                       | conserved hypothetical protein                                                              | See H53E                                                                                             |
| H77B-1     | 43813   | EHF_0045                                                       | major outer membrane protein<br>OMP1-19                                                     | See H77A-4                                                                                           |
| H77B-2     | 516921  | Intergenic, 66 bp<br>up EHF_0470                               | conserved hypothetical protein                                                              | n/a                                                                                                  |

|        |         |                                                      |                                                                                                                                        |                                                                                                     |
|--------|---------|------------------------------------------------------|----------------------------------------------------------------------------------------------------------------------------------------|-----------------------------------------------------------------------------------------------------|
| H77B-3 | 46141   | EHF_0048                                             | major outer membrane protein OMP1-17                                                                                                   | See H69F-2                                                                                          |
| H77C-1 | 516769  | Intergenic, 218 bp up EHF_0470                       | conserved hypothetical protein                                                                                                         | n/a                                                                                                 |
| H77C-2 | 217716  | Intergenic                                           | n/a                                                                                                                                    | n/a                                                                                                 |
| H77D-1 | 1125230 | Intergenic, 143 bp up EHF_0978 and 62 bp up EHF_0979 | 2,3,4,5-tetrahydropyridine-2,6-dicarboxylate N-succinyltransferase, hypothetical protein with MJ0042 family finger-like domain protein | n/a                                                                                                 |
| H77D-2 | 525060  | Intergenic                                           | n/a                                                                                                                                    | n/a                                                                                                 |
| H77E-1 | 448957  | Intergenic, 626 bp 425 bp up EHF_0423                | Xaa-Pro aminopeptidase                                                                                                                 | n/a                                                                                                 |
| H77E-2 | 753371  | EHF_0671                                             | Hypothetical protein                                                                                                                   | See H64F-2                                                                                          |
| H77F   | 936950  | EHF_0810                                             | BolA protein                                                                                                                           | 83% Eucl, 94% Emu, 72% Ech, 73% Emin, 70% Eca, 64% Eru, 51% Wol, 40% Aph                            |
| H78    | 257958  | Intergenic                                           | n/a                                                                                                                                    | n/a                                                                                                 |
| H79A-1 | 1132802 | Intergenic, 440 bp up EHF_0987                       | GTP cyclohydrolase                                                                                                                     | n/a                                                                                                 |
| H79A-2 | 813074  | EHF_0718                                             | Major Facilitator Superfamily (MFS) transporter                                                                                        | 94% Eucl, 95% Emu, 75% Ech, 75% Eca, 65% Eru, 37% Nlo, 35% Ana                                      |
| H79A-3 | 64253   | EHF_0069                                             | nucleoside-diphosphate kinase                                                                                                          | 96% Eucl, 97% Emu, 94% Ech, 91% Eca, 88% Eru, 73% Nlo, 64% Ana, 69% Wol, 64% Nhe, 64% Nsen          |
| H79C-1 | 870872  | EHF_0758                                             | hypothetical protein                                                                                                                   | See H58C                                                                                            |
| H79C-2 | 834447  | EHF_0733                                             | hypothetical protein with GTA TIM-barrel-like domain protein                                                                           | See H43A                                                                                            |
| H79C-3 | 152197  | Intergenic                                           |                                                                                                                                        | n/a                                                                                                 |
| H79C-4 | 62134   | Intergenic, 438 bp up EHF_0066                       | P44/Msp2 family outer membrane protein                                                                                                 | n/a                                                                                                 |
| H79D-1 | 513076  | EHF_RS02075                                          | Hypothetical protein (pseudogene due to frameshift)                                                                                    | n/a                                                                                                 |
| H79D-2 | 827624  | Intergenic                                           | n/a                                                                                                                                    | n/a                                                                                                 |
| H79E-1 | 946167  | Intergenic                                           | n/a                                                                                                                                    | n/a                                                                                                 |
| H79E-2 | 407501  | EHF_0383                                             | sodium:alanine symporter family protein                                                                                                | 95% Eucl, 96% Emu, 90% Ech, 88% Emin, 87% Eca, 70% Eru, 60% Nlo, 57% Wol, 54% Ana, 39% Nhe, 37% Nri |
| H80A-1 | 42923   | Intergenic, 246 bp up EHF_0044                       | major outer membrane protein OMP1-20                                                                                                   | n/a                                                                                                 |
| H80A-2 | 1061828 | Intergenic, 83 bp up EHF_0922                        | n/a                                                                                                                                    | n/a                                                                                                 |
| H80B-1 | 1044678 | EHF_0905                                             | hypothetical protein                                                                                                                   | 55 Eucl, 55% Emu, 36% Ech                                                                           |

|        |         |                                                       |                                                                                          |                                                                                                      |
|--------|---------|-------------------------------------------------------|------------------------------------------------------------------------------------------|------------------------------------------------------------------------------------------------------|
| H80B-2 | 1005383 | Intergenic, 164 bp up EHF_0868                        | n/a                                                                                      | n/a                                                                                                  |
| H80B-3 | 112044  | EHF_0115                                              | Gamma carbonic anhydrase family protein                                                  | 92% Eucl, 95% Emu, 96% Ech, 80% Emin, 82% Eca, 64% Eru, 64% Nlo, 63% Wol, 63% Ana, 57% Nsen, 55% Nri |
| H80B-4 | 820620  | EHF_0723                                              | DNA mismatch repair protein MutS                                                         | See H74B-2                                                                                           |
| H80B-5 | 1008450 | Intergenic                                            | n/a                                                                                      | n/a                                                                                                  |
| H80C-1 | 919082  | 986 bp up EHF_0795                                    | n/a                                                                                      | n/a                                                                                                  |
| H80C-2 | 1131409 | EHF_0984                                              | conserved hypothetical protein                                                           | 88% Eucl, 85% Emu, 82% Ech, 72% Emin, 71% Eca, 62% Eru                                               |
| H80C-3 | 382057  | EHF_0346                                              | cell division ZapA family protein                                                        | 96% Eucl, 98% Emu, 88% Ech, 80% Emin, 80% Eca, 76% Eru, 40-50% Wo, 35% Aov, 33% Ama                  |
| H80D-1 | 763703  | Intergenic                                            | n/a                                                                                      | n/a                                                                                                  |
| H80D-2 | 607098  | 139 bp up EHF_0545                                    | conserved hypothetical protein - pseudogene                                              | n/a                                                                                                  |
| H80D-3 | 810577  | EHF_0717                                              | Major Facilitator Superfamily (MFS) transporter                                          | See H69E                                                                                             |
| H80E   | 1018051 | 7 bp up EHF_0880                                      | conserved hypothetical protein                                                           | 79% Emu, 52% Eca, 55% Emin, 53% Ech                                                                  |
| H80F   | 929685  | 8 bp up EHF_0806                                      | 3-phosphoshikimate 1-carboxyvinyltransferase                                             | 91% Eucl, 95% Emu, 74% Ech, 67% Emin, 67% Eca, 54% Eru, 37% Nlo                                      |
| H81A-1 | 751268  | Intergenic                                            | n/a                                                                                      | n/a                                                                                                  |
| H81A-2 | 897331  | EHF_0775                                              | putative membrane protein                                                                | 65% Eucl, 69% Emu, 51% Ech, 53% Emin, 52% Eca, 48% Eru, 25% Ana                                      |
| H81B-1 | 545195  | EHF_0497                                              | hypothetical protein                                                                     | 64% Emu, 36% Eucl, 30% Ech, 23% Emin                                                                 |
| H81B-2 | 920774  | 182 bp up EHF_0796, 546 bp up EHF_0797                | conserved hypothetical protein, tRNA-Leu                                                 | n/a                                                                                                  |
| H81C-1 | 1013847 | Intergenic, 160 bp up EHF_0874 and 109 bp up EHF_0875 | hypothetical protein, conserved hypothetical protein                                     | n/a                                                                                                  |
| H81C-2 | 122477  | EHF_0125                                              | peptidase M16 family protein                                                             | 93% Emu, 89% Ech, 85% Emin, 85% Eca, 68% Eru, 50% Nlo, 43% Aph, 40% Ana, 43% Wol                     |
| H81D   | 573935  | EHF_0515                                              | Chromosome segregation protein SMC (structural maintenance of chromosomes) archaeal type | 56% Eucl, 56% Emu, 44% Ech, 34% Emin                                                                 |
| H81E   | 1070542 | Intergenic                                            | n/a                                                                                      | n/a                                                                                                  |
| H82A-1 | 448861  | 722 bp up EHF_0423                                    | n/a                                                                                      | n/a                                                                                                  |

|        |         |                               |                                                                                  |                                                                                                              |
|--------|---------|-------------------------------|----------------------------------------------------------------------------------|--------------------------------------------------------------------------------------------------------------|
| H82A-2 | 161191  | EHF_0150                      | conserved hypothetical protein                                                   | 96% Eucl, 94% Emu, 85% Ech, 79% Eca, 78% Emin, 63% Eru, 35% Nlo, 30% Ace                                     |
| H82A-3 | 1098537 | EHF_0956                      | octaprenyl-diphosphate synthase                                                  | 98% Eucl, 96% Emu, 88% Ech, 87% Eca, 86% Emin, 74% Eru, 62% Nlo, 52% Ace, 53% Ama, 51% Aov, 50% Aph, 52% Wol |
| H82B-1 | 509073  | 343 bp up EHF_0462            | n/a                                                                              | n/a                                                                                                          |
| H82B-2 | 45484   | EHF_0048                      | major outer membrane protein OMP1-17                                             | See H69F-2                                                                                                   |
| H82C   | 491800  | EHF_0446                      | DUF2460 domain-containing protein                                                | 95% Eucl, 95% Emu, 86% Ech, 83% Eca, 82% Emin, 76% Eru, 64% Nlo, 58% Wol, 49% Aph                            |
| H82D-1 | 737087  | Intergenic, 87 bp up EHF_0656 | bifunctional ADP-dependent NAD(P)H-hydratedehydratase/ NAD(P)H-hydrate epimerase | n/a                                                                                                          |
| H82D-2 | 892485  | EHF_0772                      | DNA mismatch repair protein MutL                                                 | 93% Eucl, 92% Emu, 81% Ech, 76% Eca, 77% Emin, 66% Eru, 59% Nlo, 57% Wol, 51% Aph, 40% Ots                   |
| H82E-1 | 188165  | Intergenic                    | n/a                                                                              | n/a                                                                                                          |
| H82E-2 | 753814  | EHF_0671                      | Hypothetical protein                                                             | See H64F-2                                                                                                   |
| H82E-3 | 999937  | 279 bp up EHF_0861            | n/a                                                                              | n/a                                                                                                          |

### Abbreviations:

Up: upstream of ORFs; Ech: *E. chaffeensis*; Eca: *E. canis*; Emu: *E. muris*; Emin: *E. minasensis*; Eru: *E. ruminantium*; Eucl: *E. muris* subsp. *Eauclairensis*; Eew: *E. ewingii*; Nhe: *Neorickettsia helminthoeca*; Nri: *N. risticii*; Nlo: *Candidatus Neoehrlichia lotoris*; Nsen: *N. sennetsu*, Ana: several *Anaplasma* species; Aph: *A. phagocytophilum*; Ace: *A. centrale*; Aov: *A. ovis*; Ama: *A. marginale*; Wol: *Wolbachia*; Ots: *Orientia tsutsugamushi*; Rick: *Rickettsia* species
